# Supplementary material for: Trypanosome outer kinetochore proteins suggest conservation of chromosome segregation machinery across eukaryotes
Source: PubMed Central journal article supplement — J Cell Biol. 2017 Feb;216(2):379–91. doi: 10.1083/jcb.201608043 (PMC5294786; doi:10.1083/jcb.201608043), 2017-02
Supplement: JCB_201608043_sm.pdf [file JCB_201608043_sm.pdf]

D'Archivio and Wickstead, <https://doi.org/10.1083/jcb.201608043>

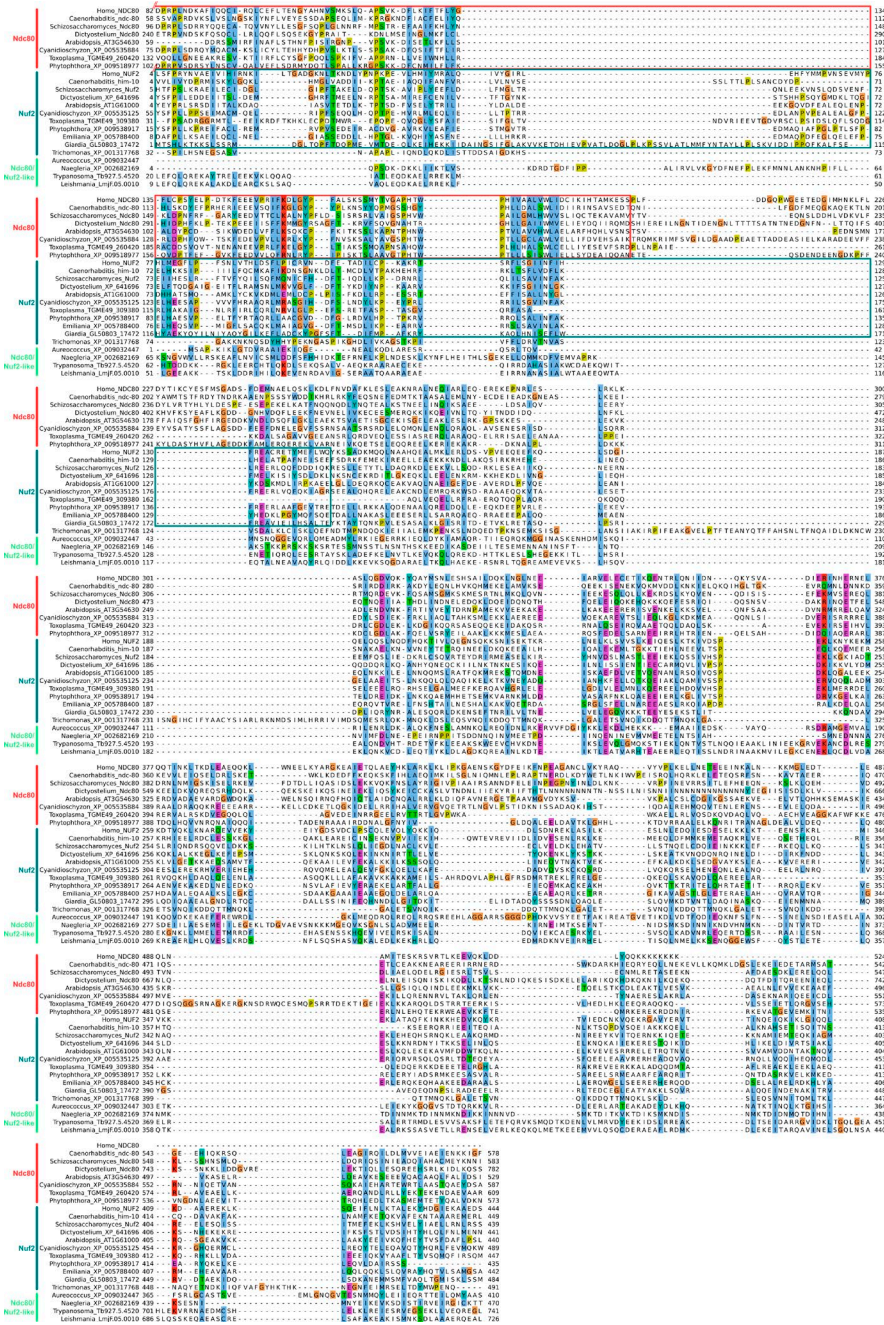

Figure S1. Alignment of Ndc80- and Nuf2-like sequences from various eukaryotic models. Boxes indicate the extent of the Pfam Ndc80\_HEC1 (red) and Nuf2 (teal) domains. Excision of a section of ~250 aa present toward the C terminus of kinetoplastid sequences only (*Trypanosoma* and *Leishmania*) is indicated in the indices on the right.

THE JOURNAL OF CELL BIOLOGY

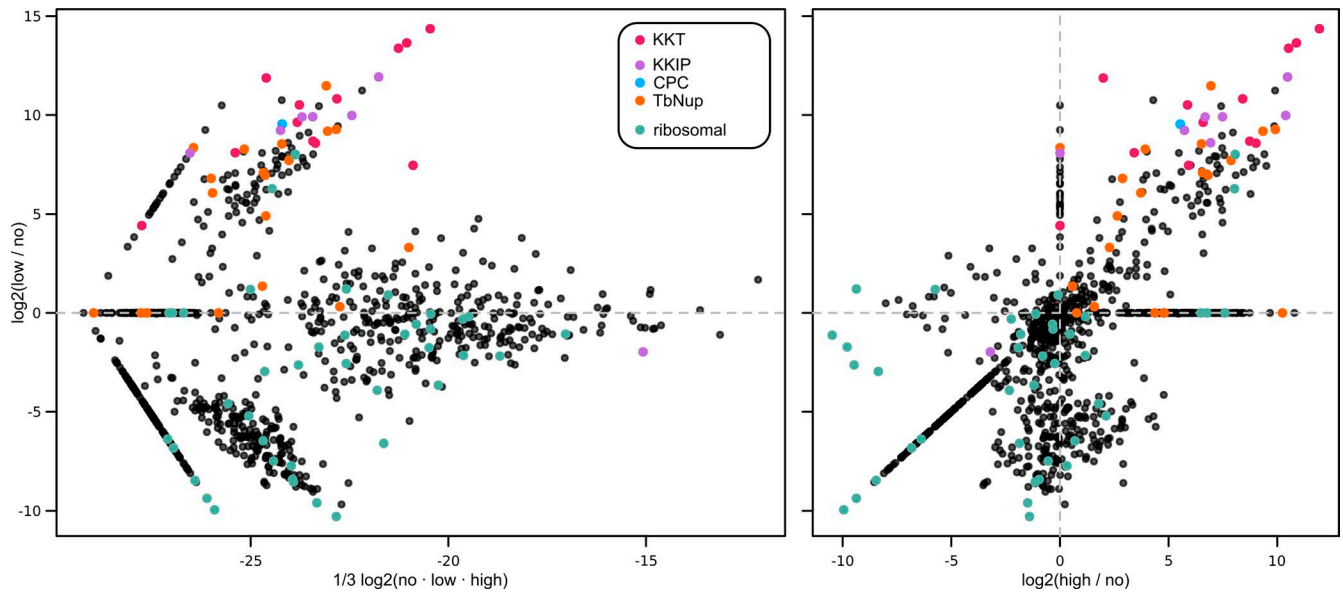

Figure S2. **Label-free semiquantitative proteomic data (Fig. 4) highlighting sequences from specific protein sets.** Highlighted are components of: KKT (Akiyoshi and Gull, 2014) and KKIP kinetochore sets, chromosome passenger complex (CPC; only TbAUK1 detected; Li et al., 2009), trypanosomal nucleoporins (TbNup; 19 out of 27 identified TbNups detected in any sample; DeGrasse et al., 2009; Obado et al., 2016), and proteins annotated as “ribosomal” in *T. brucei* TREU927 genome (TriTrypDB.org release 9.0 annotations; 62 out of 134 detected in any sample). For display, intensities of proteins not detected for a specific condition are set to an arbitrary minimum value.

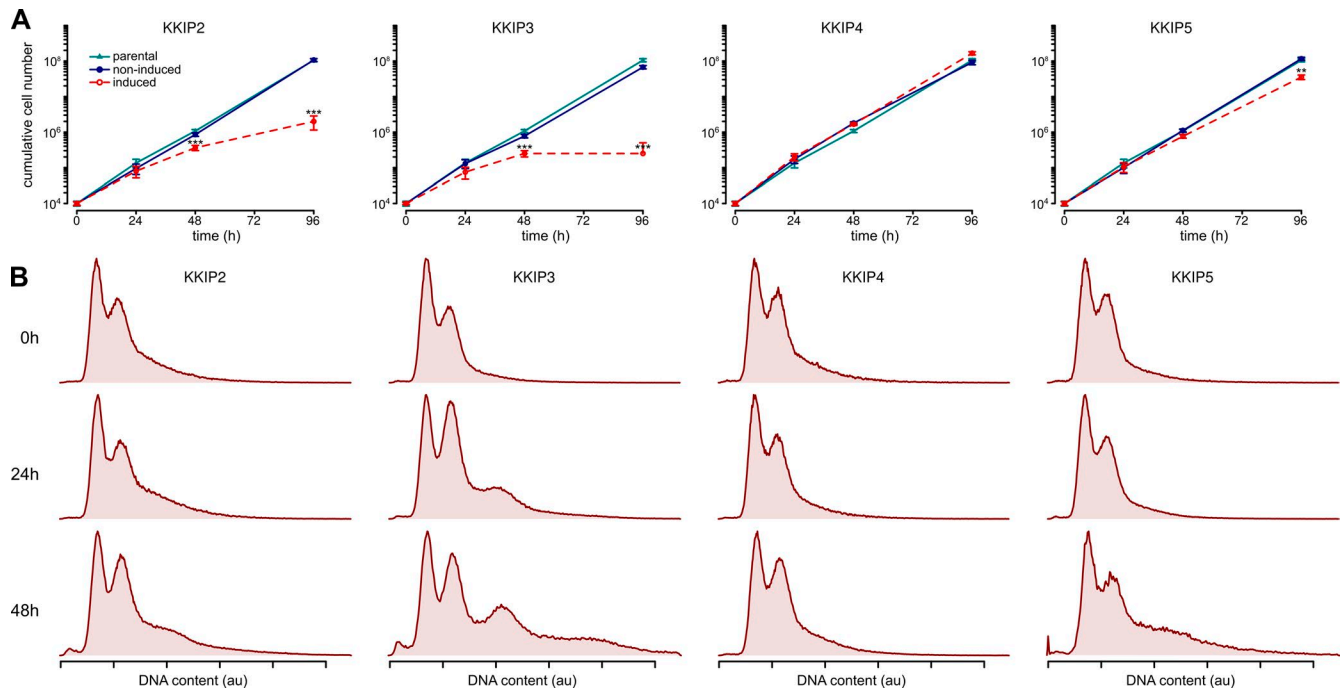

Figure S3. **Effect of depletion of KKIP2-5 by induction of RNAi.** (A) Growth of cells depleted of KKIP2, 3, 4, or 5. Error bars show SEM ( $n = 3$ ; \*\*,  $P < 0.01$ ; \*\*\*,  $P < 0.001$ ; Student's *t* test). (B) DNA content in RNAi-induced cells. Content was assessed by flow cytometry using fluorescence of propidium iodide stain (arbitrary units [au]). Representative data from two repeats shown.

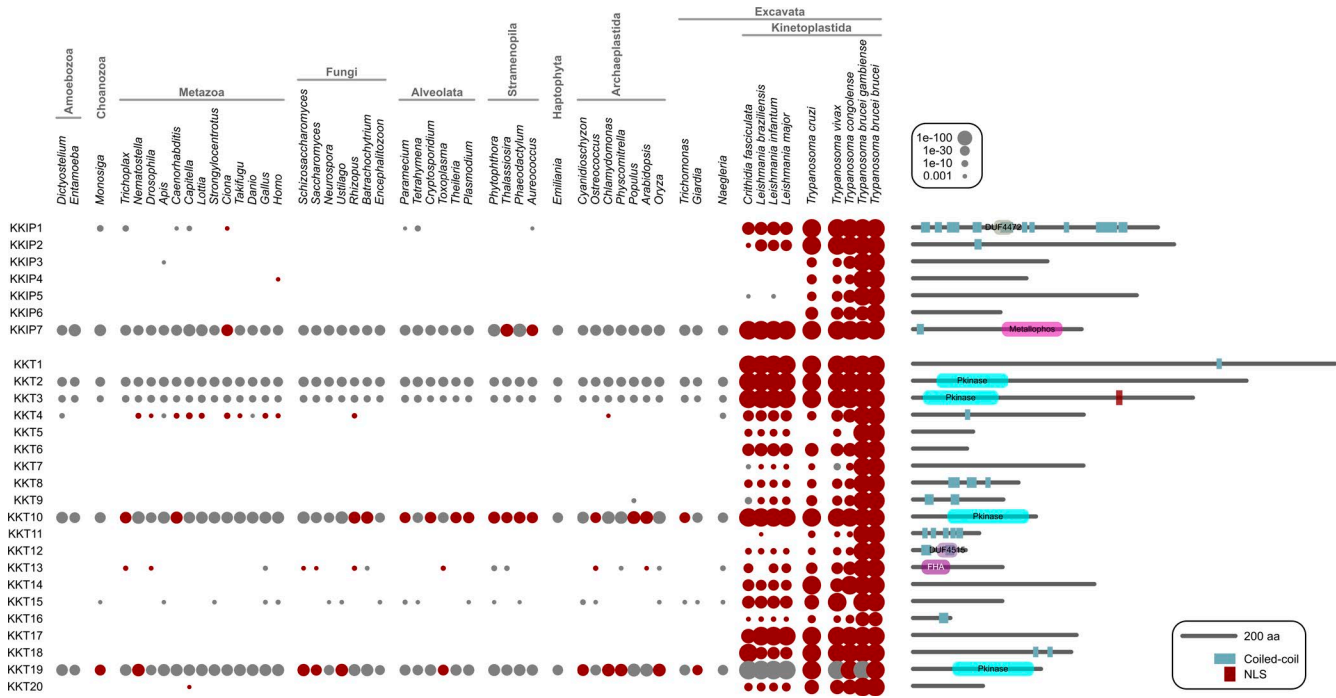

Figure S4. BLAST-based similarity searches to show the distribution of easily detected orthologues to trypanosomal kinetochore proteins (KKT and KKI) in the predicted proteomes of other Kinetoplastida and a wide range of eukaryotic lines. Spot size represents the strength of BLAST hit (e-value). Red shows reciprocal best-BLAST hits between genomes; gray shows nonreciprocating hits. Predicted protein architectures: Pfam domains with e-value  $\leq 0.001$ , regions of coiled-coil (Lupas et al., 1991), and predicted nuclear localization signals (NLS; Stradamus) are shown for the *T. brucei* sequences.

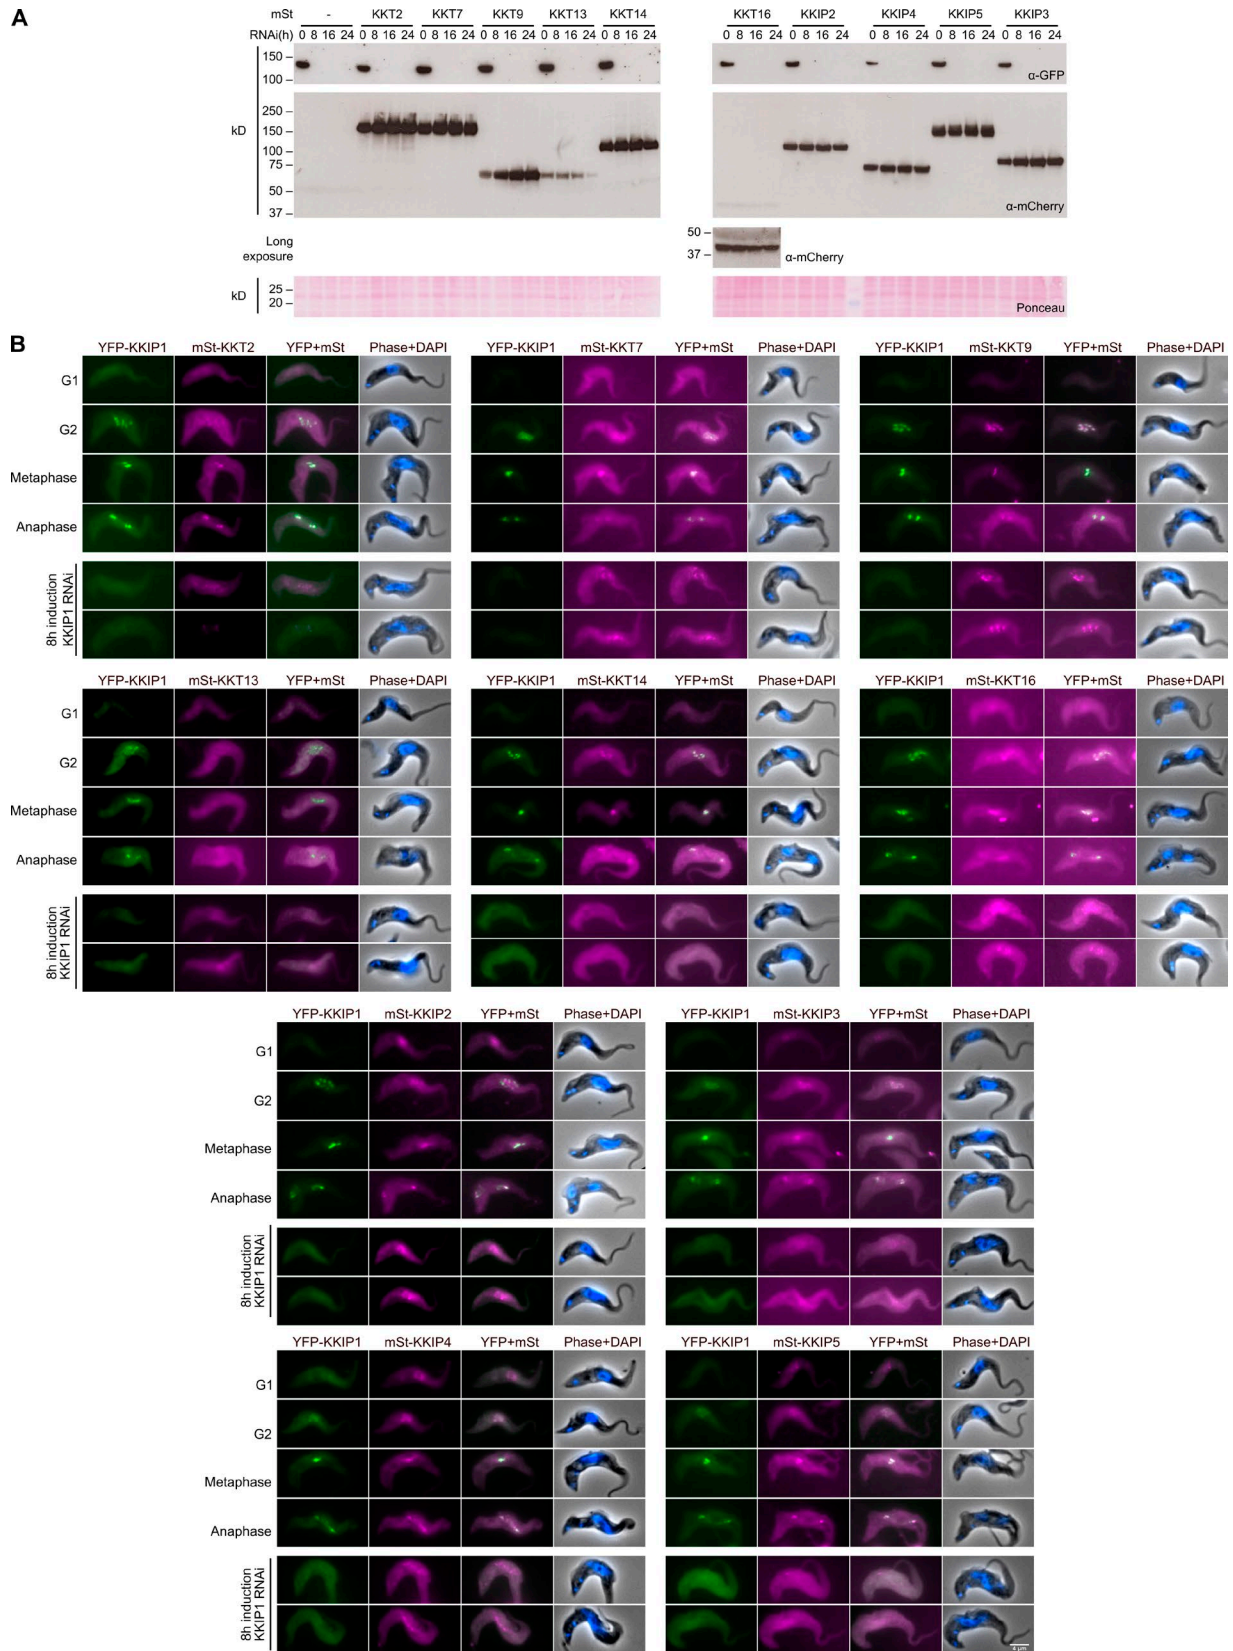

Figure S5. **Dependency of KKT and KKIP protein localization on KKI1.** (A) Change in overall cellular levels of KKT and KKIP components upon depletion of KKI1. Immunoblots are shown for cells expressing YFP-KKI1 and mStrawberry-tagged KKT or KKIP protein. A long exposure of the blot is shown for mSt-KKT16. Protein loading is shown by Ponceau S stain. (B) Localization of KKT and KKIP components through the cell cycle and in cells depleted of KKI1. Micrographs show bloodstream-form cells expressing YFP-KKI1 and mStrawberry (mSt)-tagged KKT or KKIP protein. RNAi against *KKI1* was induced for 8 h. mSt-KKIP2 remains in the nucleus on RNAi, but does not form kinetochore-like foci.

Table S1. Top hits between kinetoplastid orthologue groups and an HMM of diverse Ndc80 and Nuf2 sequences

| Orthologue group | e-value                | Score | <i>T. brucei</i> TREU927 gene identification numbers | Description (TriTrypDB)                          | Comment                                      | PMID     |
|------------------|------------------------|-------|------------------------------------------------------|--------------------------------------------------|----------------------------------------------|----------|
| OG5_141718       | 2.1 × 10 <sup>-8</sup> | 71.8  | Tb05.5K5.160; Tb927.5.4520                           | Hypothetical protein, conserved                  |                                              |          |
| OG5_147717       | 2.4 × 10 <sup>-8</sup> | 71.2  | Tb11.v5.0753; Tb927.10.840                           | Hypothetical protein, conserved                  | FAZ6, localized to the FAZ                   | 25736289 |
| OG5_147082       | 5 × 10 <sup>-8</sup>   | 70.8  | Tb927.2.4810                                         | Hypothetical protein, conserved                  | TbCMF5                                       | 17227795 |
| OG5_148374       | 9.9 × 10 <sup>-8</sup> | 64.1  | Tb927.11.4400                                        | Hypothetical protein, conserved                  |                                              |          |
| OG5_145178       | 1.3 × 10 <sup>-7</sup> | 73    | Tb927.10.1450                                        | Plectin, putative                                |                                              | 23264645 |
| OG5_148122       | 1.8 × 10 <sup>-7</sup> | 64    | Tb927.6.4550                                         | Hypothetical protein, conserved                  |                                              |          |
| OG5_144798       | 2.1 × 10 <sup>-7</sup> | 65.8  | Tb927.8.780                                          | Hypothetical protein, conserved                  |                                              |          |
| OG5_131340       | 2.3 × 10 <sup>-7</sup> | 64    | Tb927.4.2140                                         | MBO2, flagellar component                        |                                              | 17227795 |
| OG5_148036       | 3.6 × 10 <sup>-7</sup> | 65.1  | Tb927.9.1600                                         | Hypothetical protein, conserved                  |                                              |          |
| OG5_130053       | 4.1 × 10 <sup>-7</sup> | 59.1  | Tb927.11.16090                                       | Outer dynein arm docking complex, putative (DC2) |                                              | 20126266 |
| OG5_148971       | 5.3 × 10 <sup>-7</sup> | 61.4  | Tb927.10.4200                                        | Hypothetical protein, conserved                  |                                              |          |
| OG5_127071       | 8.8 × 10 <sup>-7</sup> | 60.8  | Tb927.11.13920; Tb927.3.2040; Tb927.5.2090           | Kinesin, putative                                | OG contains Kinesin-2 and Kinesin-17 members |          |

Table S2. KKIP1-interacting proteins and controls localized in trypanosomes

| Gene identification number | Name  | Localization      | Identical polypeptide | Indistinguishable by MS | Description (TriTrypDB)                                     |
|----------------------------|-------|-------------------|-----------------------|-------------------------|-------------------------------------------------------------|
| Test set                   |       |                   |                       |                         |                                                             |
| Tb927.5.4520               | KKIP1 | Kinetochore       | Tb05.5K5.160          |                         | Hypothetical protein, conserved                             |
| Tb927.5.1320               | KKIP2 | Kinetochore       |                       |                         | Hypothetical protein, conserved                             |
| Tb927.10.6700              | KKIP3 | Kinetochore       |                       |                         | Hypothetical protein, conserved                             |
| Tb927.7.3080               | KKIP4 | Kinetochore       |                       |                         | Hypothetical protein, conserved                             |
| Tb927.7.6630               | KKIP5 | Kinetochore       |                       |                         | Hypothetical protein, conserved                             |
| Tb927.1.4680               | KKIP6 | Kinetochore       |                       |                         | Hypothetical protein, conserved                             |
| Tb927.11.12480             | KKIP7 | Kinetochore       |                       |                         | Kinetoplastid-specific phosphoprotein phosphatase, putative |
| Tb927.3.3740               |       | Nuclear           |                       |                         | Hypothetical protein, conserved                             |
| Tb927.9.13970              |       | Nuclear           |                       |                         | Hypothetical protein, conserved                             |
| Tb927.9.1410               |       | Nuclear           |                       |                         | Hypothetical protein, conserved                             |
| Tb927.11.3710              |       | Flagellar         |                       |                         | Hypothetical protein, conserved                             |
| Tb927.10.14500             |       | Not localized     |                       |                         | Hypothetical protein, conserved                             |
| Tb927.11.9510              |       | Nuclear periphery |                       |                         | Nucleic acid binding protein, putative                      |
| Low cross-link controls    |       |                   |                       |                         |                                                             |
| Tb927.9.10100              |       | Cytoplasmic       |                       |                         | Hypothetical protein, conserved                             |
| Tb927.5.1900               |       | Not localized     |                       |                         | Hypothetical protein, conserved                             |
| Tb927.7.4910               |       | Flagellar         | Tb11.v5.0172          |                         | Hypothetical protein, conserved                             |
| Tb927.8.4950               |       | Cytoplasmic       |                       |                         | Kinesin, putative                                           |
| Tb927.9.10400              |       | Nucleolar         |                       |                         | Hypothetical protein, conserved                             |
| High cross-link controls   |       |                   |                       |                         |                                                             |
| Tb927.10.14630             |       | Nucleolar         |                       | Tb927.10.14750          | Fibrillar, putative                                         |
| Tb927.11.5230              |       | Nuclear           |                       |                         | Hypothetical protein, conserved                             |
| Tb927.11.12380             |       | Nuclear           |                       |                         | Hypothetical protein, conserved                             |

Provided online are two Excel tables. Table S3 provides data from label-free semiquantitative mass spectrometry of KKIP1-interacting proteins. Table S4 shows primer sequences used in the generation of constructs for endogenous locus tagging and RNA interference.

## References

- Akiyoshi, B., and K. Gull. 2014. Discovery of unconventional kinetochores in kinetoplastids. *Cell*. 156:1247–1258. <http://dx.doi.org/10.1016/j.cell.2014.01.049>
- DeGrasse, J.A., K.N. DuBois, D. Devos, T.N. Siegel, A. Sali, M.C. Field, M.P. Rout, and B.T. Chait. 2009. Evidence for a shared nuclear pore complex architecture that is conserved from the last common eukaryotic ancestor. *Mol. Cell. Proteomics*. 8:2119–2130. <http://dx.doi.org/10.1074/mcp.M900038-MCP200>
- Li, Z., T. Umeyama, and C.C. Wang. 2009. The Aurora Kinase in *Trypanosoma brucei* plays distinctive roles in metaphase-anaphase transition and cytokinetic initiation. *PLoS Pathog.* 5:e1000575. <http://dx.doi.org/10.1371/journal.ppat.1000575>
- Lupas, A., M. Van Dyke, and J. Stock. 1991. Predicting coiled coils from protein sequences. *Science*. 252:1162–1164. <http://dx.doi.org/10.1126/science.252.5009.1162>
- Obado, S.O., M. Brillantes, K. Uryu, W. Zhang, N.E. Ketaren, B.T. Chait, M.C. Field, and M.P. Rout. 2016. Interactome mapping reveals the evolutionary history of the nuclear pore complex. *PLoS Biol.* 14:e1002365. <http://dx.doi.org/10.1371/journal.pbio.1002365>
